# Supplementary material for: In situ formation of zinc ferrite modified Al-doped ZnO nanowire arrays for solar water splitting
Source: Royal Society of Chemistry journal article supplement (doi:10.1039/c5ta10563c), 2016-01-01
Supplement: c5ta10563c1.pdf [file c5ta10563c1.pdf]

## Electronic Supplementary Information

### ***In-situ* formation of zinc ferrite modified Al-doped ZnO nanowire arrays for solar water splitting**

Yang-Fan Xu, Hua-Shang Rao, Xu-Dong Wang, Hong-Yan Chen, Dai-Bin Kuang\*  
and Cheng-Yong Su

MOE Key Laboratory of Bioinorganic and Synthetic Chemistry, Lehn Institute of Functional Materials, School of Chemistry and Chemical Engineering, Sun Yat-sen University, Guangzhou 510275, P. R. China.

Fax: (+86) 20-8411 3015.

E-mail: [kuangdb@mail.sysu.edu.cn](mailto:kuangdb@mail.sysu.edu.cn)

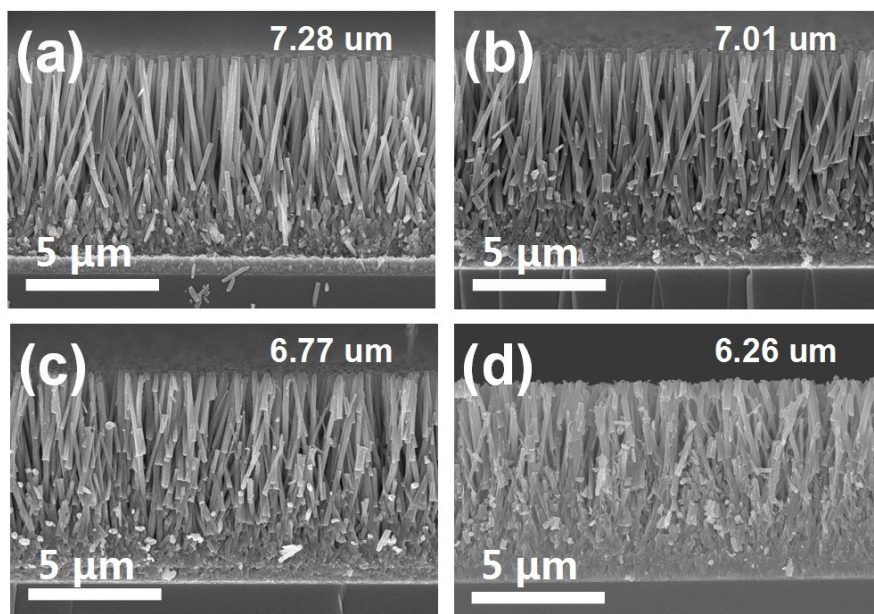

**Fig. S1** The cross-section views of the (a) AZO photoanode and AZO-ZFO photoanodes with different treating time: (b) 1 min, (c) 3 min, (d) 7 min.

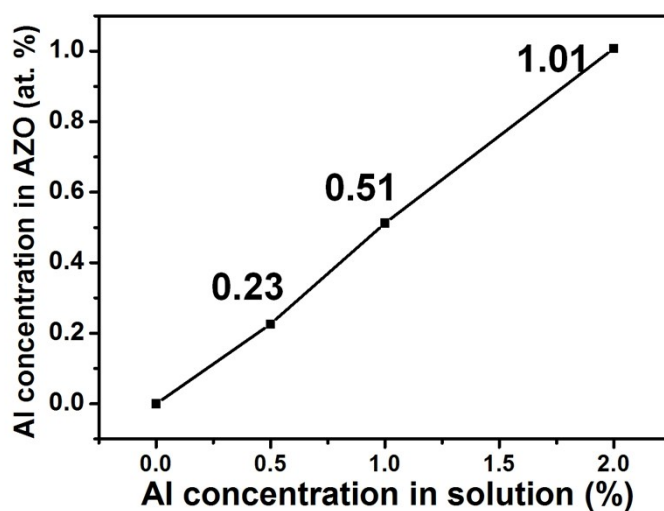

**Fig. S2** Al concentration in hydrothermal deposition solution vs Al concentration in the AZO as determined by EDS. It can be concluded that the Al concentration in AZO film is approximate half of that in solution.

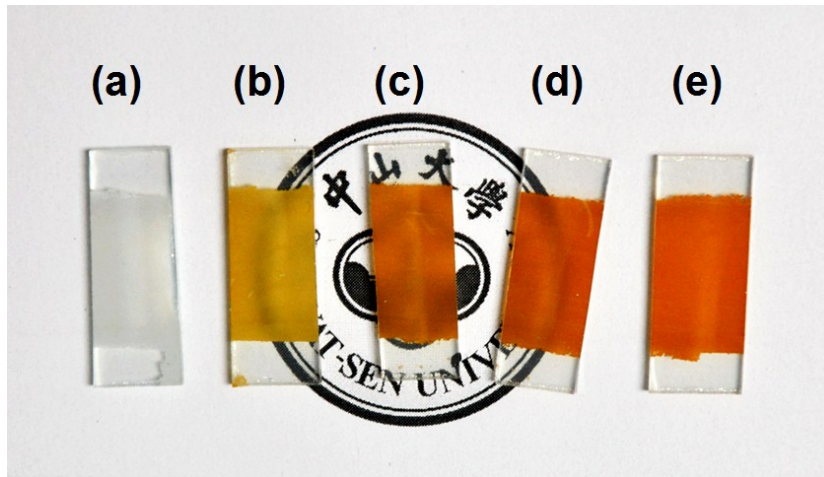

**Fig. S3** The digital photographs of the (a) AZO photoelectrode and AZO-ZFO photoelectrodes with different treating time: (b) 1 min, (c) 3 min, (d) 5 min, (e) 7 min.

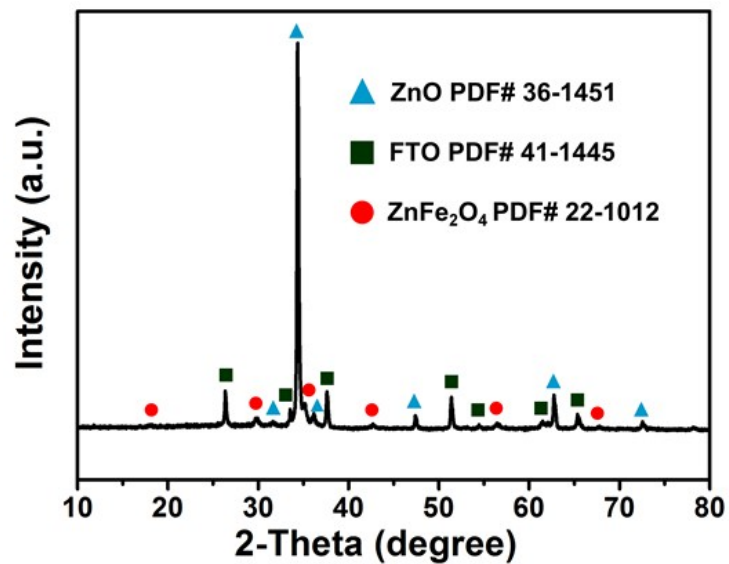

**Fig. S4** XRD pattern of the AZO-ZFO-3 min.

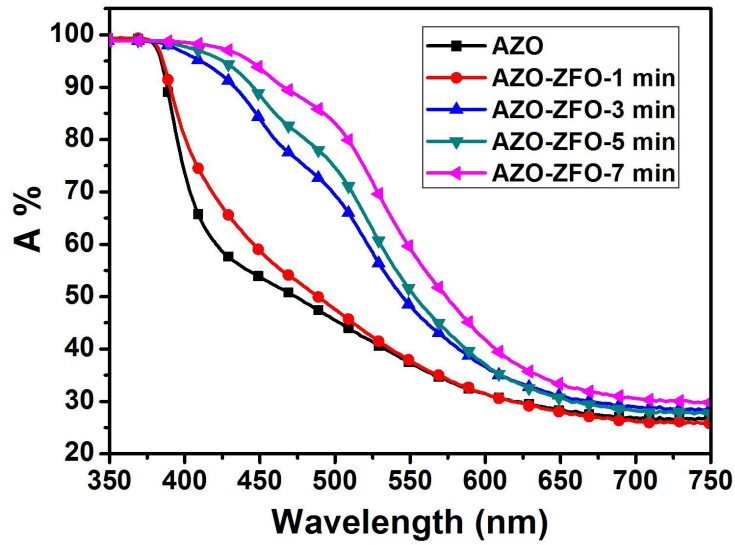

**Fig. S5** The absorption spectra of AZO and AZO-ZFO photoelectrodes. Notably,  $A\% = 1 - T\% - R\%$ .

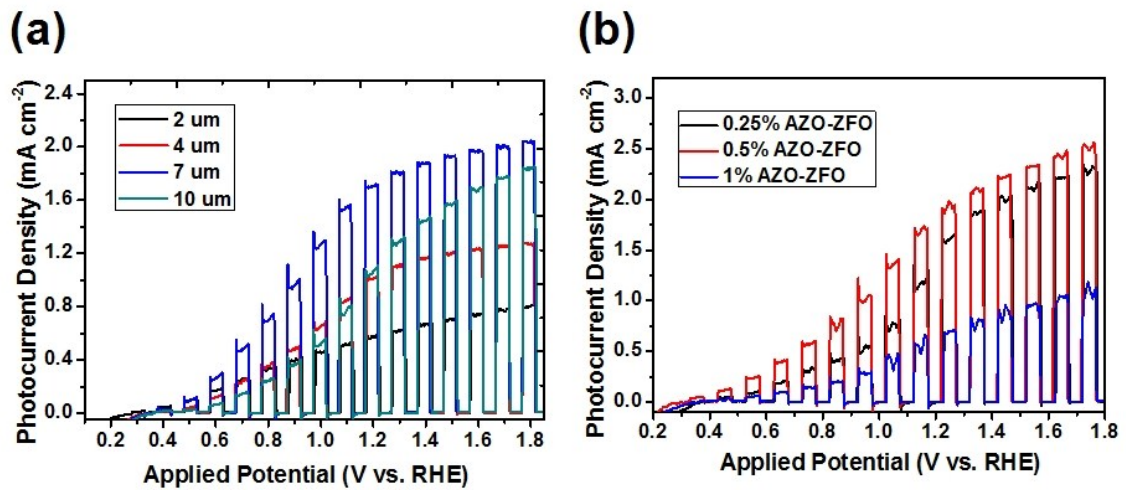

**Fig. S6** The LSV curves under chopped illumination of photoelectrodes with (a) various film thickness and (b) Al dopant concentrations.

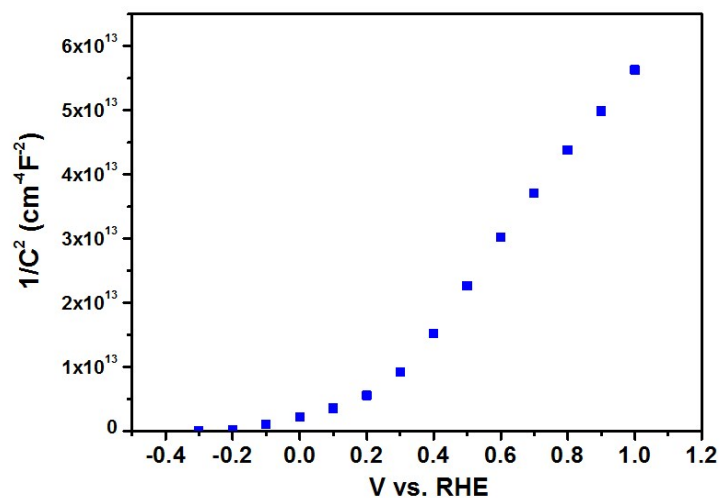

**Fig. S7** Mott-Schottky plots of the AZO-ZFO-3 min sample measured in dark at 1 KHz, in 0.1 M Na<sub>2</sub>SO<sub>4</sub> solution.

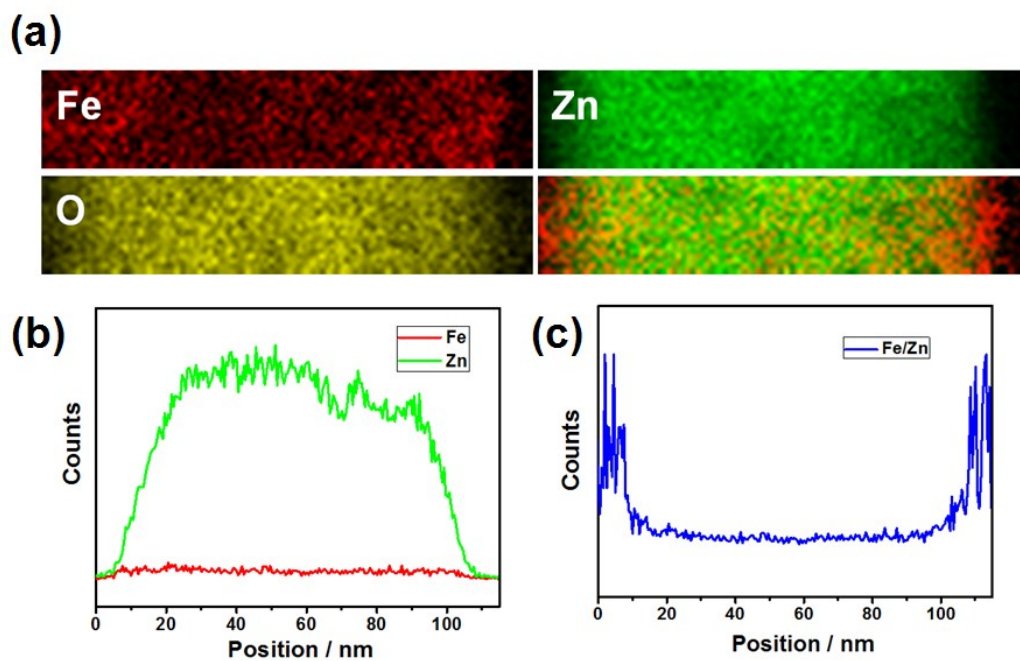

**Fig. S8** The EDX mappings of AZO-ZFO-1min (a) and the corresponding line scanning data (b). To clearly illustrate the Fe distribution, the Fe/Zn plots as a function of scan position were processed according to the line scanning results.

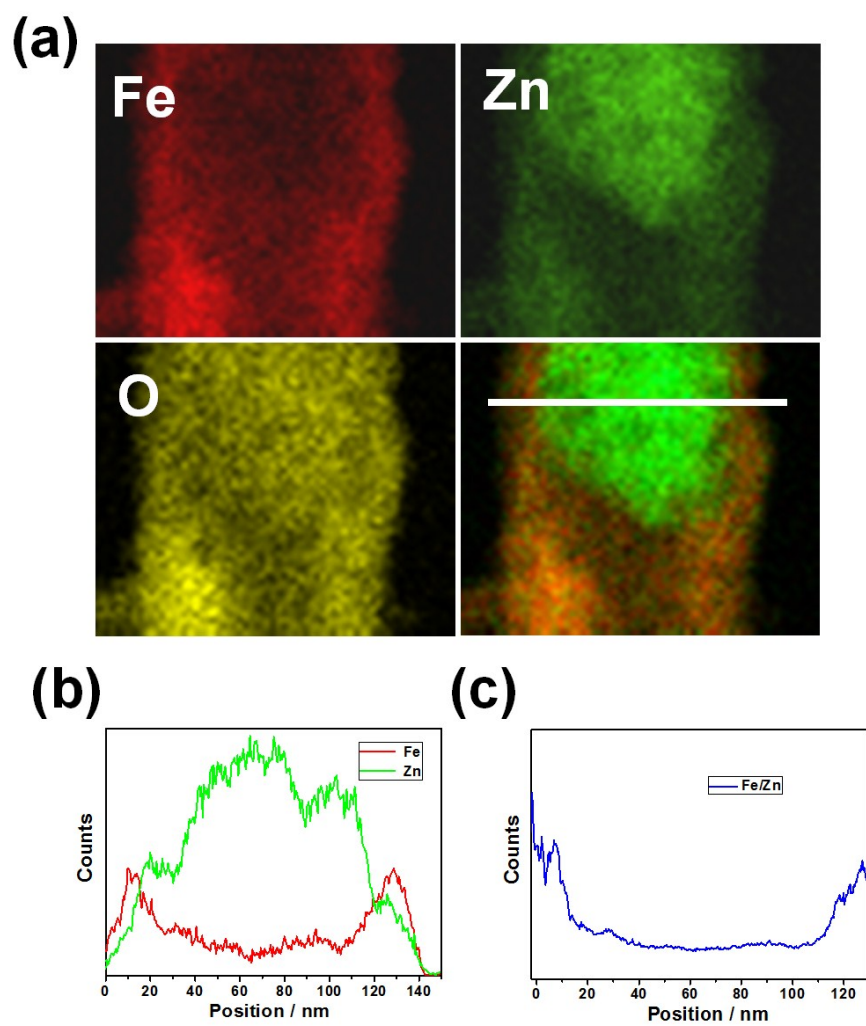

**Fig. S9** (a) The EDX mappings (b) the line scanning data and (c) the corresponding the Fe/Zn plots as a function of scan position (with bar) of AZO-ZFO-3min.

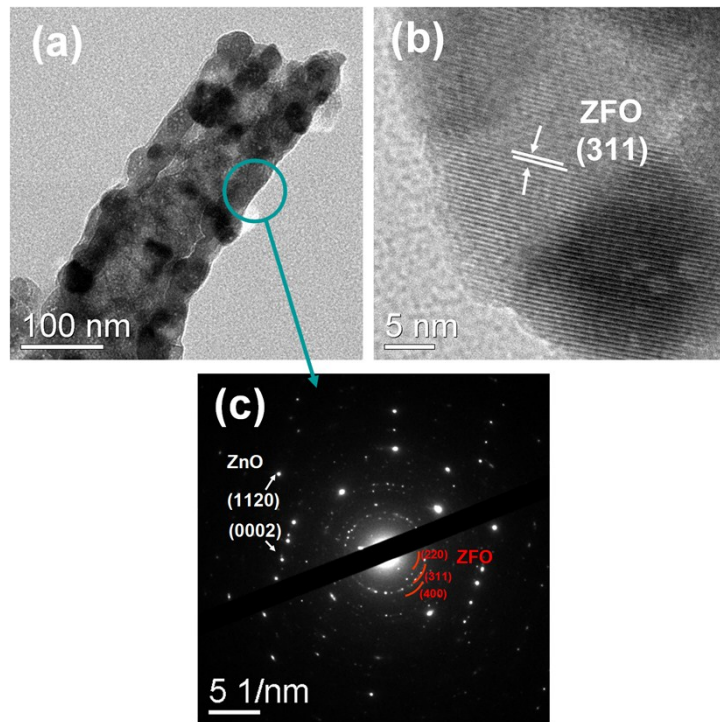

**Fig. S10** (a) TEM image and (b) the corresponding HRTEM image of 0.5% AZO-ZFO-7 min. (c) The selected area electron diffraction (SAED) pattern, which can index to the single-phase AZO and the multi-phase ZFO.

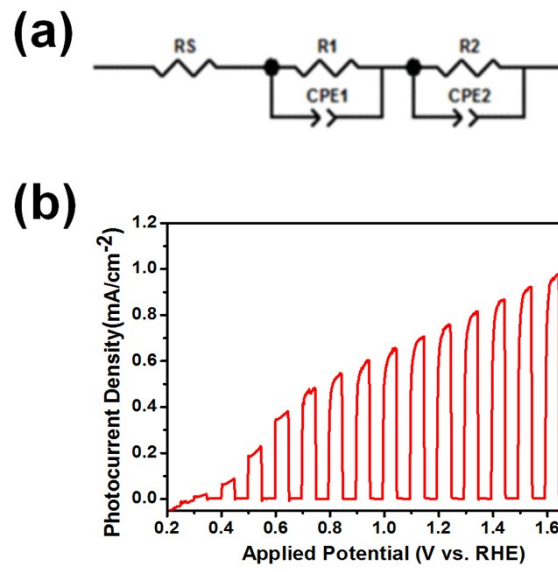

**Fig. S11** (a) Equivalent circuit model used to fit the EIS data. (b) The LSV curve of the ZnO-ZFO-3min sample.



**Table S1** Comparison of photoelectrochemical water oxidation performances for zinc ferrite involved photoanodes.

| Sample                                                                         | Test Condition                                                      | Photocurrent density (mA cm <sup>-2</sup> )                | Ref.         |
|--------------------------------------------------------------------------------|---------------------------------------------------------------------|------------------------------------------------------------|--------------|
| Al:ZnO nanorod array/<br>ZnFe <sub>2</sub> O <sub>4</sub>                      | 100 mW cm <sup>-2</sup> ,<br>0.1 M Na <sub>2</sub> SO <sub>4</sub>  | 1.72 @ 1.23 V <sub>RHE</sub>                               | This<br>work |
| ZnO nanorod / ZnFe <sub>2</sub> O <sub>4</sub>                                 | 100 mW cm <sup>-2</sup> ,<br>0.1 M Na <sub>2</sub> SO <sub>4</sub>  | 0.57 @ 0.8 V <sub>Ag/AgCl</sub> (~1.4 V <sub>RHE</sub> )   | 1            |
| TiO <sub>2</sub> nanotube / ZnFe <sub>2</sub> O <sub>4</sub>                   | 100 mW cm <sup>-2</sup> ,<br>0.01 M Na <sub>2</sub> SO <sub>4</sub> | ~0.55 @ 0.60 V <sub>SCE</sub> (~1.23 V <sub>RHE</sub> )    | 2            |
| ZnO nanorod / ZnFe <sub>2</sub> O <sub>4</sub>                                 | 100 mW cm <sup>-2</sup> ,<br>0.1 M Na <sub>2</sub> SO <sub>4</sub>  | ~0.045 @ 0.6 V <sub>Ag/AgCl</sub> (~1.2 V <sub>RHE</sub> ) | 3            |
| ZnFe <sub>2</sub> O <sub>4</sub> nanorod array                                 | 100 mW cm <sup>-2</sup> ,<br>1 M NaOH                               | 0.24 @ 1.23 V <sub>RHE</sub>                               | 4            |
| ZnFe <sub>2</sub> O <sub>4</sub> nanorods array                                | 100 mW cm <sup>-2</sup> ,<br>1 M NaOH                               | 0.32 @ 1.23 V <sub>RHE</sub>                               | 5            |
| ZnFe <sub>2</sub> O <sub>4</sub> thin films                                    | 100 mW cm <sup>-2</sup> ,<br>1 M NaOH                               | 0.35 @ 0.23 V <sub>Ag/AgCl</sub> (~1.23 V <sub>RHE</sub> ) | 6            |
| α-Fe <sub>2</sub> O <sub>3</sub> / ZnFe <sub>2</sub> O <sub>4</sub>            | 100 mW cm <sup>-2</sup> ,<br>1 M NaOH                               | 0.80 @ 1.23 V <sub>RHE</sub>                               | 7            |
| Al-treated α-Fe <sub>2</sub> O <sub>3</sub> / ZnFe <sub>2</sub> O <sub>4</sub> | 100 mW cm <sup>-2</sup> ,<br>1 M NaOH                               | ~0.42 @ 0.40 V <sub>Ag/AgCl</sub> (~1.4 V <sub>RHE</sub> ) | 8            |
| α-Fe <sub>2</sub> O <sub>3</sub> nanorod / ZnFe <sub>2</sub> O <sub>4</sub>    | 100 mW cm <sup>-2</sup> ,<br>0.1 M glucose<br>+0.5 M NaOH           | ~0.30 @ 0.20 V <sub>Ag/AgCl</sub> (~1.2 V <sub>RHE</sub> ) | 9            |

## References:

1. A. Sheikh, A. Yengantiwar, M. Deo, S. Kelkar, S. Ogale, *Small* **2013**, *9*, 2091-2096.
2. X. Li, Y. Hou, Q. Zhao, G. Chen, *Langmuir* **2011**, *27*, 3113-3120.
3. D. D. Qin, C. L. Tao, *RSC Adv.* **2014**, *4*, 16968-16972.

4. J. H. Kim, J. H. Kim, J.-W. Jang, J. Y. Kim, S. H. Choi, G. Magesh, J. Lee, J. S. Lee, *Adv. Energy Mater.* **2015**, *5*, 20140193.
5. J. H. Kim, Y. J. Jang, J. H. Kim, J. W. Jang, S. H. Choi, J. S. Lee, *Nanoscale* **2015**, *7*, 19144-19151
6. A. A. Tahir, K. G. U. Wijayantha, *J. Photochem. Photobio. A* **2010**, *216*, 119-125.
7. Z. Luo, C. Li, D. Zhang, T. Wang, J. Gong, *Chem. Commun.* **2015**, DOI: 10.1039/C5CC09321J.
8. K. J. McDonald, K. S. Choi, *Chem. Mater.* **2011**, *23*, 4863-4869.
9. Y. H. Guo, Y. M. Fu, Y. Liu, S. H. Shen, *RSC Adv.* **2014**, *4*, 36967-36972.
